# Supplementary material
Source: Research Square preprint supplement (doi:10.21203/rs.3.rs-8820380/v1)
Supplement: Supplementary file 1 [file 5adb536f91374b6ffe81bb39.docx]

**Supplementary Fig. 1** **(A, B)** Glucose and lactate concentration in the culture medium. **(C)** ATP generation normalized to total protein content. **(D-F)** Seahorse XF Cell Mito Stress Test: OCR curves, ATP production, maximal respiration. **(G, H)** NAD⁺/NADH ratio and NADH levels. **(I, J)** Intracellular ROS by DHE staining. **(K, L)** Mitochondrial membrane potential by TMRE staining. *p < 0.05, **p < 0.01, ***p < 0.001, ****p < 0.0001.
